# Supplementary material
Source: PubMed Central journal article supplement (PMC3100907)
Supplement: supp_110.037507_Supplement_1.pdf [file supp_110.037507_Supplement_1.pdf]

## **SUPPLEMENTARY INFORMATION**

Title: Alteration of hepatic, but not renal transporter expression in diet-induced obese (DIO) mice

Authors: Vijay R. More and Angela L. Slitt

Department of Biomedical and Pharmaceutical Sciences, University of Rhode Island,  
Kingston, RI 02881

Journal: Drug Metabolism Disposition

**Supplemental Table 1.** Type, dilution, molecular weight and sources of primary antibodies for western blot

| Primary antibodies | Type                     | Dilution | Mol wt | Source                                                   |
|--------------------|--------------------------|----------|--------|----------------------------------------------------------|
| Gapdh              |                          | 1:1000   | ~40    | Cell Signalling Technology, MA                           |
| Slco1a4            |                          | 1:1000   | ~70    | Abcam, MA                                                |
| Slco1b2            |                          | 1:2000   | ~70    | Dr. Curtis Klaassen, University of Kansas Medical Center |
| Abcc1              | MRPr<br>1                | 1:2000   | ~190   | Dr. George Scheffer, VU Medical Center, Amsterdam        |
| Abcc2              | M <sub>2</sub> III-<br>5 | 1:600    | ~190   | Chemicon International- Millipore, MA                    |
| Abcc3              | M <sub>3</sub> II-2      | 1:2000   | ~180   | Dr. George Scheffer, VU Medical Center, Amsterdam        |
| Abcc4              | M <sub>4</sub> I-<br>10  | 1:2000   | ~160   | Dr. George Scheffer, VU Medical Center, Amsterdam        |
| Abcc6              | M <sub>6</sub> II-<br>68 | 1:1000   | ~165   | Dr. George Scheffer, VU Medical Center, Amsterdam        |
| Abcg2              | BXP-<br>53               | 1:2000   | ~75    | Dr. George Scheffer, VU Medical Center, Amsterdam        |

Gapdh was used as a loading control for the isolated membrane fractions.

**Supplemental Table 2.** Age, gender and ethnicity information of human liver tissue donors. Livers with more than 20% fat content were considered as steatotic.

| No | Sample ID | Type      | Gender | Ethnicity     | Age | AST <sup>a</sup> |
|----|-----------|-----------|--------|---------------|-----|------------------|
| 1  | D407      | Normal    | F      | Not available | 51  | Not available    |
| 2  | D587      | Normal    | M      | Not available | 49  | Not available    |
| 3  | D386      | Normal    | M      | Not available | 45  | Not available    |
| 4  | HH977     | Normal    | F      | Caucasian     | 38  | 23               |
| 5  | HH978     | Normal    | F      | Not available | 41  | Not available    |
| 6  | HH967     | Steatosis | F      | Caucasian     | 48  | 80               |
| 7  | HH993     | Steatosis | F      | Not available | 46  | 52               |
| 8  | HH1085    | Steatosis | M      | Caucasian     | 46  | 186              |
| 9  | HH1020    | Steatosis | M      | Caucasian     | 45  | 146              |
| 10 | HH1124    | Steatosis | M      | Caucasian     | 40  | 230              |

<sup>a</sup>Aspartate Aminotransferase, an indicator of liver damage. Normal ranges 5 to 40 units per liter of serum.
